# Supplementary material
Source: Springer Nature journal article supplement (https://www.springermedizin.de/resource/supplementary/12885_2013_4500_MOESM1_ESM.pdf/9466576)

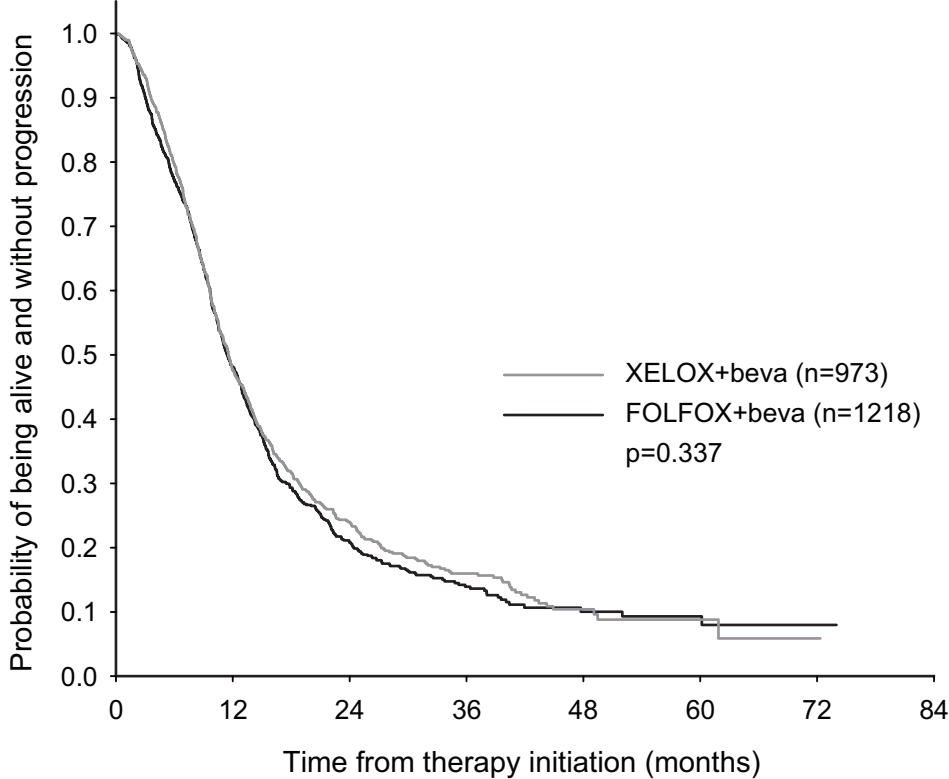

n at risk

|             |     |     |    |    |   |   |   |
|-------------|-----|-----|----|----|---|---|---|
| XELOX+beva  | 397 | 137 | 57 | 15 | 5 | 1 | 0 |
| FOLFOX+beva | 469 | 134 | 50 | 16 | 8 | 2 | 0 |

Supplement: MOESM1 [file 9466576]
